# Supplementary material
Source: MDPI journal article supplement (https://www.mdpi.com/2504-3900/97/1/203)
Supplement: s1 [file s1]

Table S1

| S.No | Name of the Data Sources | Search String                                                                                                                             |
|------|--------------------------|-------------------------------------------------------------------------------------------------------------------------------------------|
| 1    | IEEE                     | (COVID) OR (SARS CoV) AND (AEROSOL) OR (DROPLET) AND (DETECTION) NOT (DIAGNOSIS) NOT (DIAGNOSTICS) AND (BIOSENSOR) OR (BIOSENSOR SYSTEMS) |
| 2    | MDPI                     | (COVID) OR (SARS CoV) AND (AEROSOL) OR (DROPLET) AND (DETECTION) AND (BIOSENSOR) OR (BIOSENSOR SYSTEMS)                                   |
| 3    | SCOPUS                   | COVID OR SARS AND COV AND AEROSOLS AND DETECTION AND NOT DIAGNOSIS AND BIOSENSOR AND SYSTEMS                                              |
| 4    | WEB OF SCIENCE           | (COVID OR SARS CoV AND AEROSOLS OR DROPLET AND DETECTION NOT DIAGNOSIS OR DIAGNOSTICS AND BIOSENSOR OR BIOSENSOR SYSTEMS)                 |

Table S2

| S.No | Research Question                                                              | Motivation                                                                                                                                                                                          |
|------|--------------------------------------------------------------------------------|-----------------------------------------------------------------------------------------------------------------------------------------------------------------------------------------------------|
| 1    | What is the role of the biosensor system in detecting COVID-19 aerosols?       | The main motivations for writing this question are to identify COVID-19 outbreaks, determine where considerable data research may be discovered, and find appropriate targets for future study.     |
| 2    | How are biosensor systems used for risk assessment and prevention of COVID-19? | The aim is to examine the available data channels and determine the patterns in publishing data over time                                                                                           |
| 3    | What are the most used and popular mobile applications during pandemic?        | The reason for writing this question is to identify what large-scale data efforts are being utilised to encourage the extension, validation, and cooperation of work in the global pandemic battle. |

Table 3

| S.No | Inclusion Criteria                  | Exclusion Criteria |
|------|-------------------------------------|--------------------|
| 1    | features of the COVID-19 mobile app | Duplicate papers   |

|   |                                                                                                                                 |                                                                                  |
|---|---------------------------------------------------------------------------------------------------------------------------------|----------------------------------------------------------------------------------|
|   | should be described                                                                                                             |                                                                                  |
| 2 | the study should show evidence of the implementation of the COVID-19 mobile app in real-life and provide quantitative outcomes, | Literature works that need to give a clear idea of the research objective.       |
| 3 | the paper describing the study must have been written in English.                                                               | Papers that were published before 2020.                                          |
| 4 | Studies were subjected to peer review.                                                                                          | Case reports, letters to editors, pre-print papers, reviews, simulation studies, |
| 5 | All published research papers that can answer the research questions                                                            | studies describing protocols, were excluded from the review.                     |
