# Supplementary material
Source: MDPI journal article supplement (https://www.mdpi.com/2504-3900/97/1/203)
Supplement: s1 [file s1]

Archive with 1 entries (1 files):
- proceedings-2960587-Supplementary Materials.pdf
